# Supplementary material for: The neuroleptic drug pimozide inhibits stem-like cell maintenance and tumorigenicity in hepatocellular carcinoma
Source: PubMed Central journal article supplement (PMC5392272; doi:10.18632/oncotarget.4307), 2015-05-27
Supplement: oncotarget-08-17593-s001.pdf [file oncotarget-08-17593-s001.pdf]

# The neuroleptic drug pimozide inhibits stem-like cell maintenance and tumorigenicity in hepatocellular carcinoma

## Supplementary Material

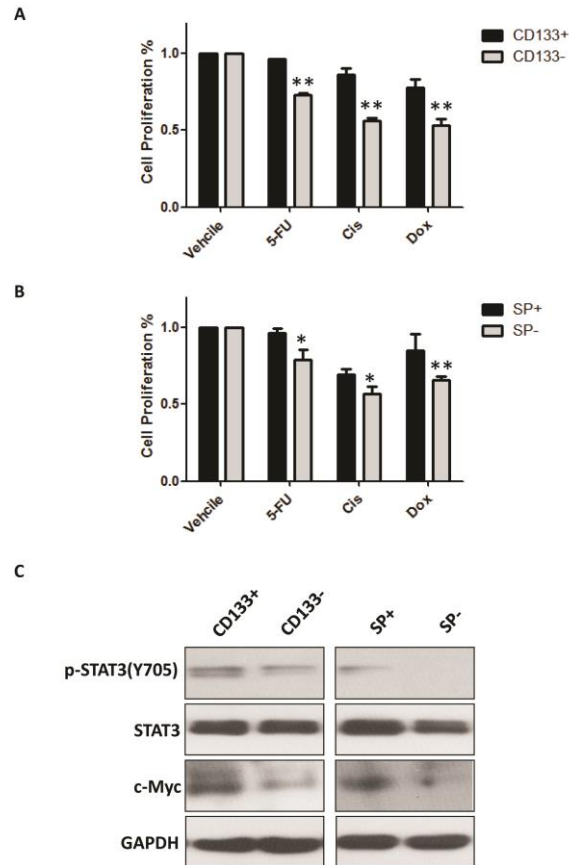

**Supplemental Figure 1: CD133-positive cells or SP cells from MHCC-97L cells are respectively resistant to chemotherapy with intracellular high STAT3 activation.** CD133-positive cells or SP cells from MHCC-97L cells were incubated with the indicated doses of chemotherapy for 24h using MTT assay. The results showed that CD133-positive cells (A) or SP+ cells (B) from MHCC-97L were respectively resistant to fluorouracil (5-FU) (50  $\mu$  M), cisplatin (Cis) (5  $\mu$  g/ml) and doxorubicin (Dox) (1  $\mu$  g/ml), compared with their control CD133 negative cells or SP- cells. Relative representative figures are shown. The data are summarized from three independent experiments, \* $p < 0.05$ , \*\* $p < 0.01$ . (C) Western blot analysis of the expression of p-STAT3(Y705), STAT3 and c-Myc in CD133-**positive** cells or SP cells from MHCC-97L cells, compared with their control cells.

**A**

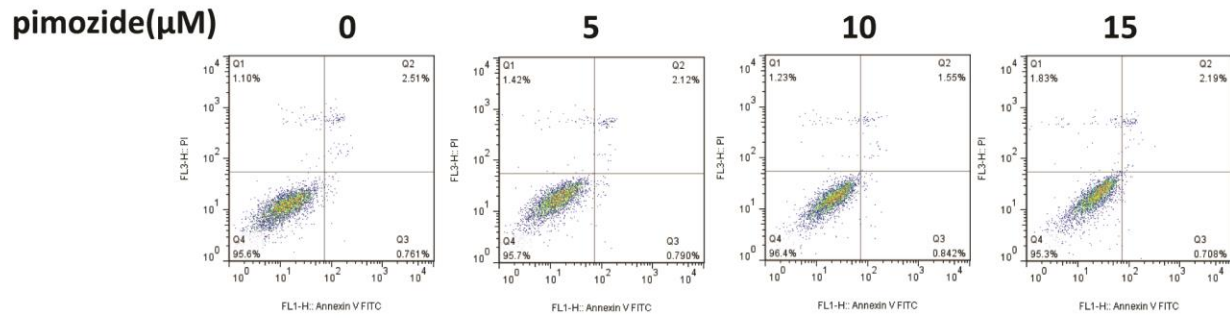

**B**

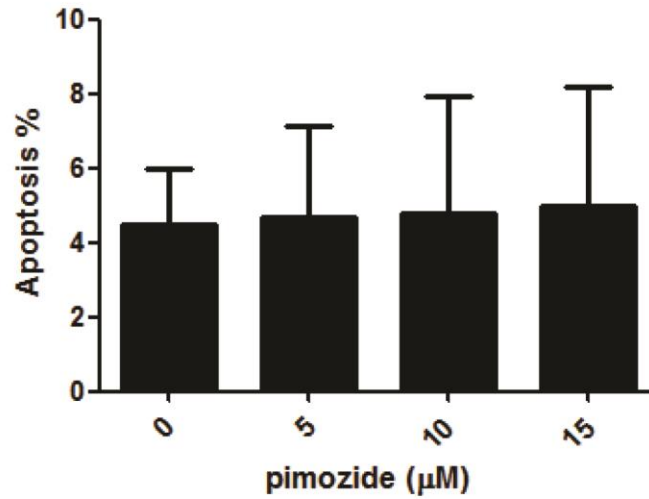

**Supplemental Figure 2: Pimozide does not induce obvious apoptosis in MHCC-97L cells.** MHCC-97L cells were treated with pimozide at different concentrations for 24h. (A) Apoptotic cells were measured by Annexin V/PI staining. (B) Data summarized three independent experiments, \* $p < 0.05$ , \*\* $p < 0.01$ , compared to control.

**A**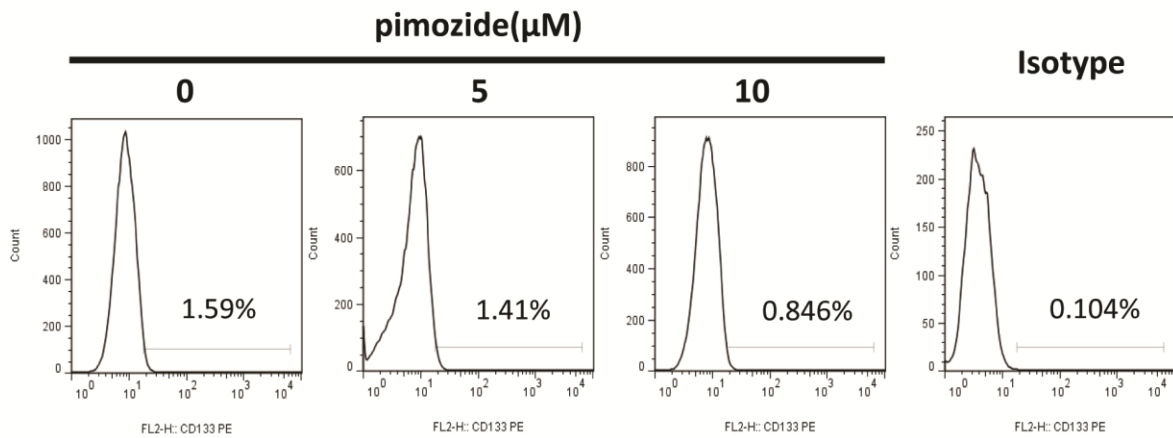**B**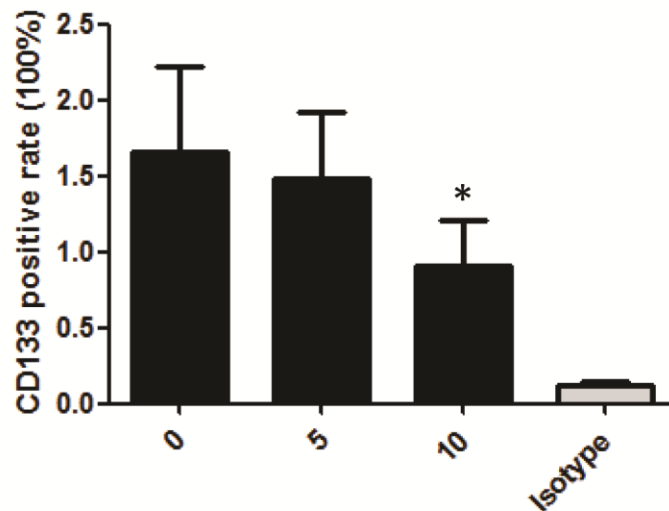

**Supplemental Figure 3: Pimozide reduces CD133 positive populations in MHCC-97L cells.**

MHCC-97L cells were treated with pimozide at different concentrations for 48h. (A) CD133 positive rate was measured by flow cytometry. (B) Data summarized three independent experiments, \* $p < 0.05$ , \*\* $p < 0.01$ , compared to control.

Supplemental Table I: The primers for qPCR

| Name          | Sense sequence(5'-3')    | Antisense sequence(5'-3') |
|---------------|--------------------------|---------------------------|
| <i>GAPDH</i>  | TCCCACTCTTCCACCTTCGATGC  | GGGTCTGGGATGGAAATTGTGAG   |
| <i>MCL1</i>   | GGCAGGATTGTGACTCTC       | CTCCTACTCCAGCAACAC        |
| <i>BCL-xL</i> | GCTGGTGGTTGACTTTCTCTC    | GGTCTCCATCTCCGATTCAGT     |
| <i>c-Myc</i>  | AGGAACAAGAAGATGAGGAAGA   | CTGCGTAGTTGTGCTGATG       |
| <i>Bmi1</i>   | G TTCACAAGACCAGACCACTAC  | GGCAGCATCAGCAGAAGGA       |
| <i>Nanog</i>  | AACTCTCCAACATCCTGAACCT   | CTGCGTCACACCATGCTATT      |
| <i>Oct4</i>   | GACAGGGGGAGGGGAGGAGCTAGG | CTTCCCTCCAACCAGTTGCCCAAAC |
